# Supplementary material for: General surfactant-free synthesis of MTiO3 (M = Ba, Sr, Pb) perovskite nanostrips
Source: Royal Society of Chemistry journal article supplement (doi:10.1039/b815698k), 2009-01-01
Supplement: b815698k.pdf [file b815698k.pdf]

# Supplementary Information

## General Surfactant-Free Synthesis of $\text{MTiO}_3$ (M = Ba, Sr, Pb)

### Perovskite Nanostrips

Hong Deng, Yongcai Qiu, Shihe Yang\*

*Department of Chemistry, The Hong Kong University of Science and Technology, Clear  
Water Bay, Kowloon, Hong Kong, China*

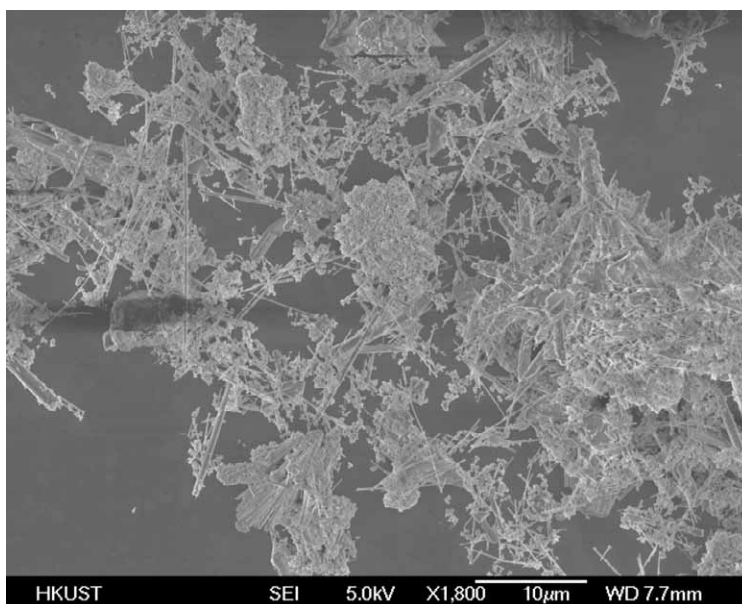

**Figure S1.** A typical SEM image of as-prepared  $\text{BaTiO}_3$  at  $860\text{ }^\circ\text{C}$  for 4 h.  $\text{TiO}_2$  (P25) was used as Ti source for reaction.

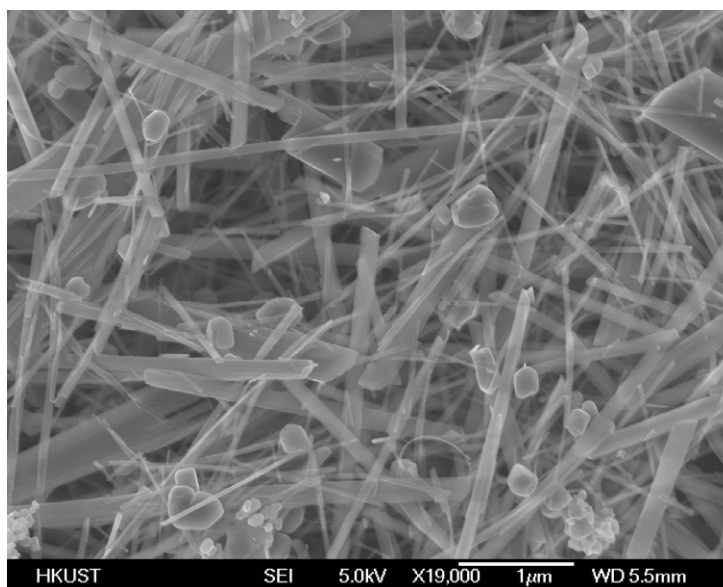

**Figure S2.** A typical SEM image of as-prepared BaTiO<sub>3</sub> at 950 °C for 2 h. TiO<sub>2</sub> (P25) was used as Ti source for reaction.

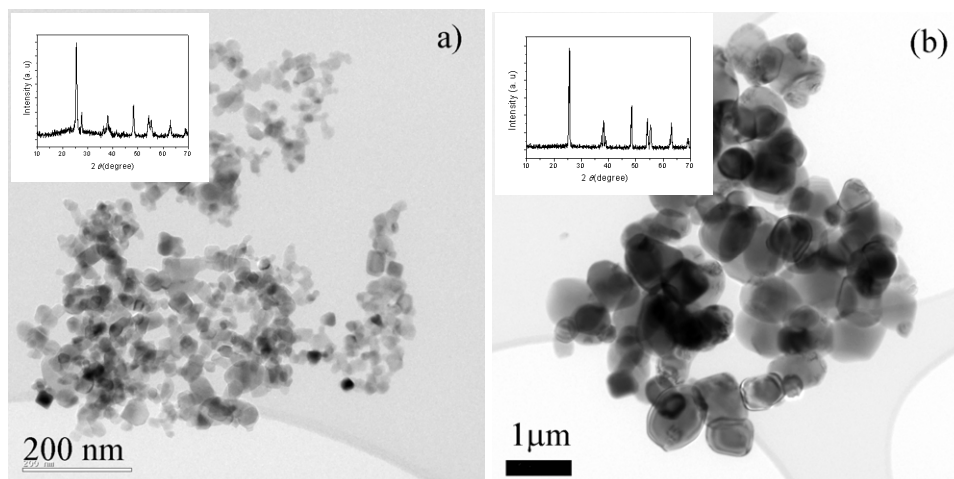

**Figure S3.** (a) A typical TEM image of TiO<sub>2</sub> (P25). Inset: Power X-ray diffractogram of the P25 sample. (b) A typical TEM image of bulk TiO<sub>2</sub>. Inset: Power X-ray diffractogram of the bulk TiO<sub>2</sub> sample.

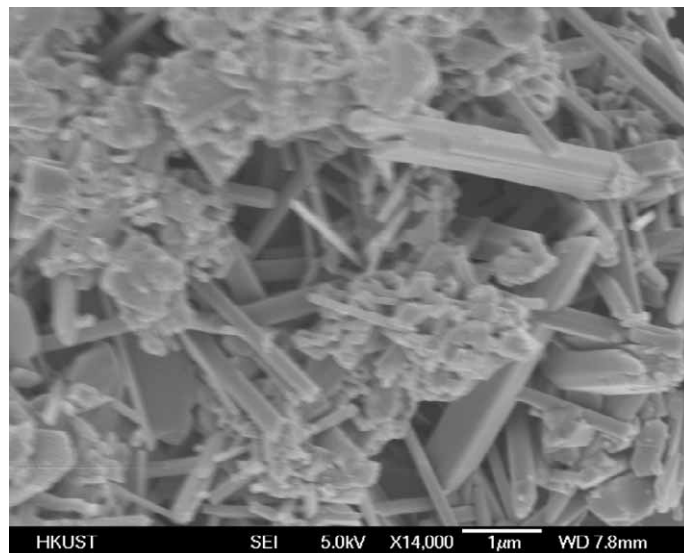

**Figure S4.** A typical SEM image of as-prepared BaTiO<sub>3</sub> at 950 °C for 4 h. Bulk TiO<sub>2</sub> was used as Ti source for the reaction.
